# Supplementary material
Source: Springer Nature journal article supplement (https://www.springermedizin.de/resource/supplementary/13000_2010_341_MOESM6_ESM.pdf/9624314)

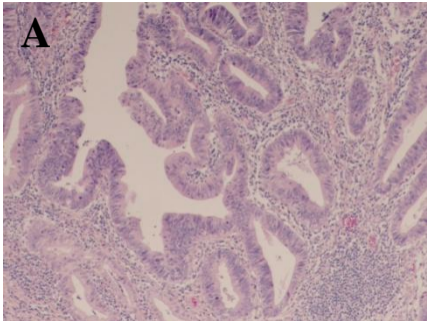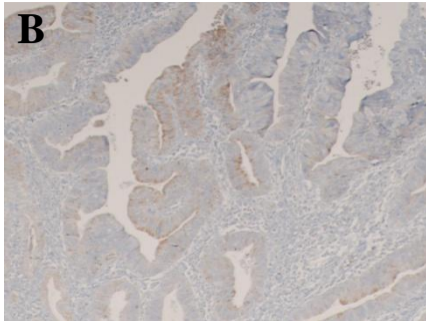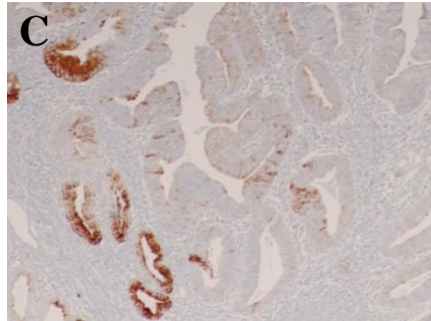

Supplement: MOESM6 [file 9624314]
